# Supplementary material
Source: HighWire-hosted journal article supplement (https://bjo.bmj.com/content/bjophthalmol-2020-318034)
Supplement: inline-supplementary-material-3 [file inline-supplementary-material-3.pdf]

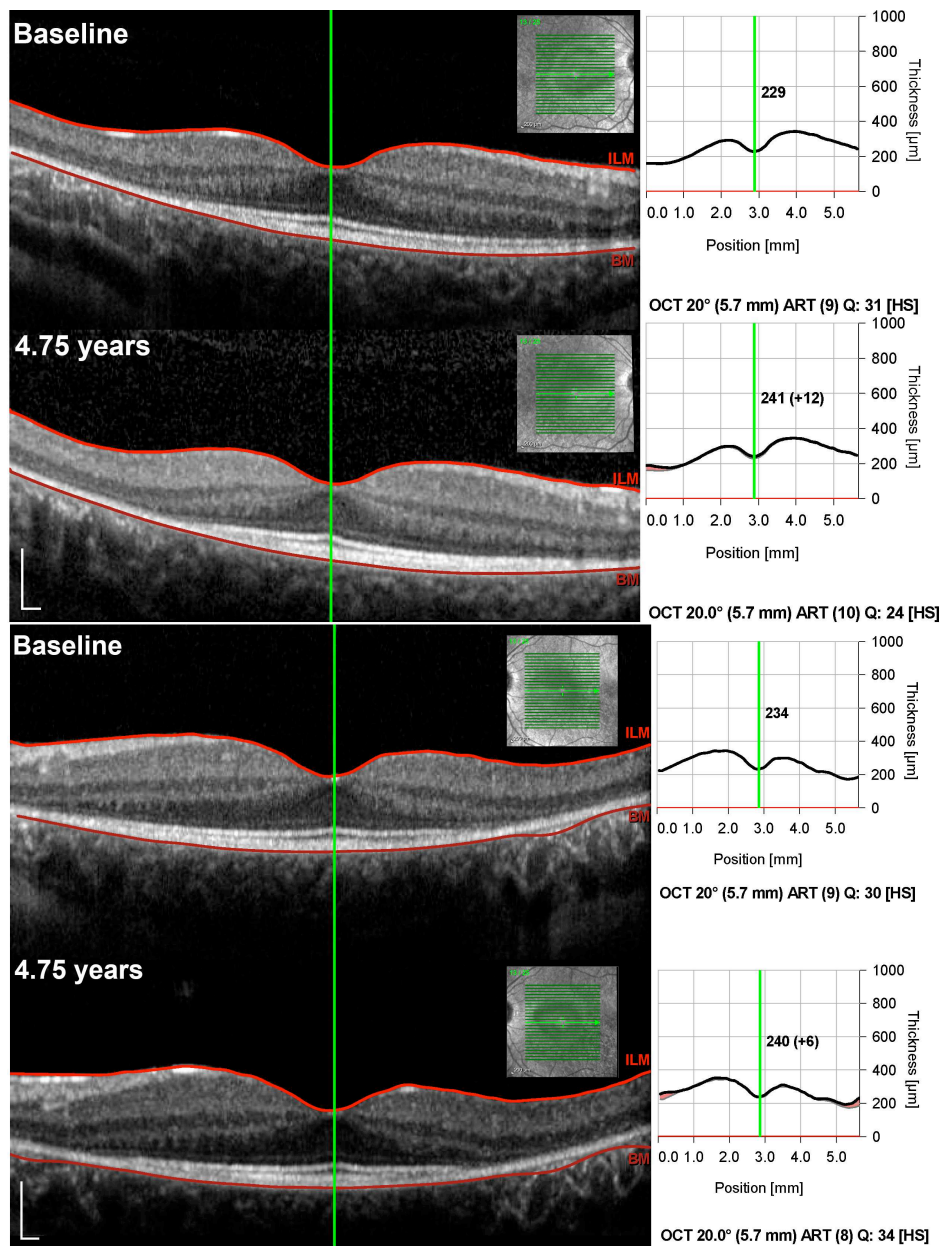

Supplemental File 2. Affected family member IV-3 (10 years old at baseline). Longitudinal analysis (4.75 years) of foveal Total Retinal Thickness (TRT) in both eyes. OCT scans obtained in follow-up mode and registered to the baseline visit. Small retinal thickness increase for right (12 $\mu$ m) and left eye (6 $\mu$ m). ILM; Internal Limiting Membrane, BM; Bruch's Membrane. Scale bars, 200  $\mu$ m.
