# Supplementary material
Source: HighWire-hosted journal article supplement (https://bjo.bmj.com/content/bjophthalmol-2020-318034)
Supplement: inline-supplementary-material-4 [file inline-supplementary-material-4.pdf]

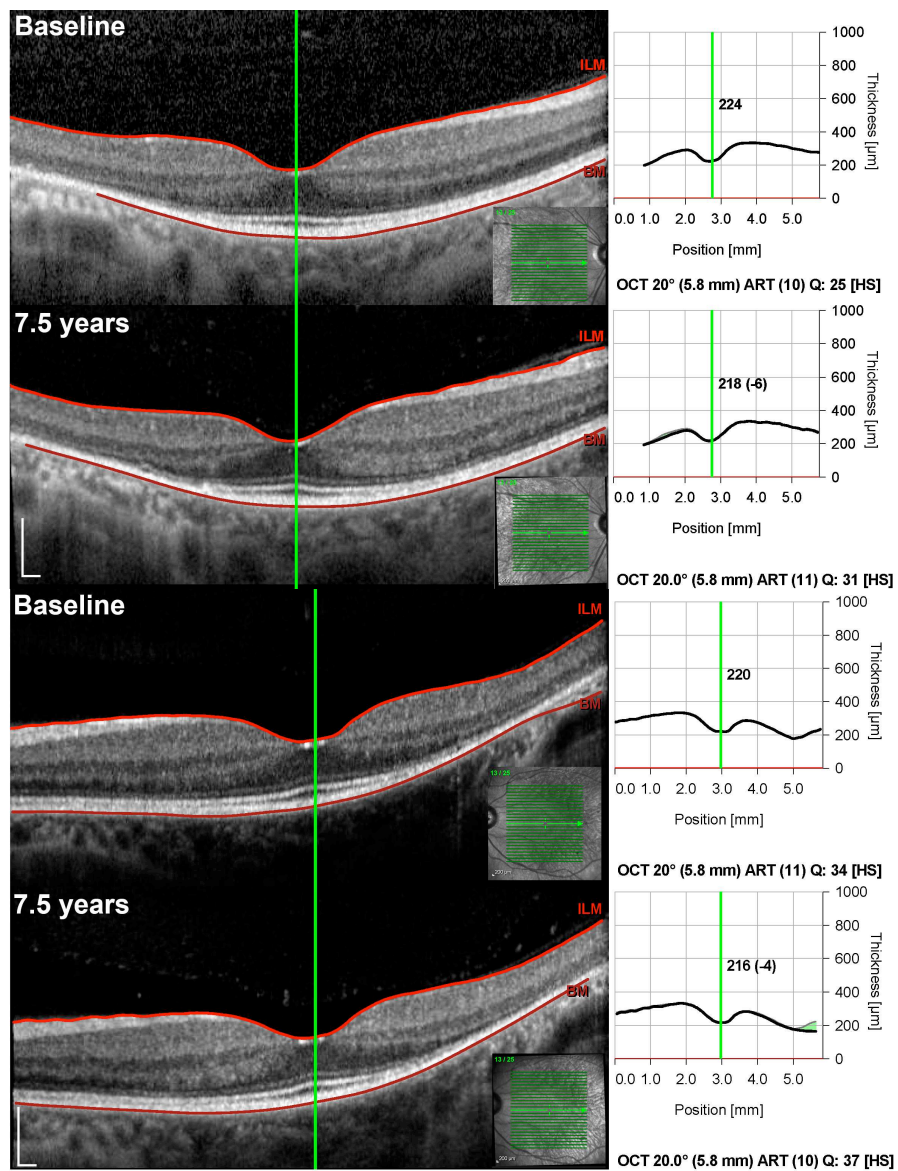

Supplemental File 3. Affected family member III-2 (36 years old at baseline). Longitudinal analysis (7.5 years) of foveal Total Retinal Thickness (TRT) in both eyes. OCT scans obtained in follow-up mode and registered to the baseline visit. Small retinal thickness loss for right (6µm) and left eye (4µm). ILM; Internal Limiting Membrane, BM; Bruch's Membrane. Scale bars, 200 µm.
