# Supplementary material
Source: HighWire-hosted journal article supplement (https://bjo.bmj.com/content/bjophthalmol-2020-318034)
Supplement: inline-supplementary-material-5 [file inline-supplementary-material-5.pdf]

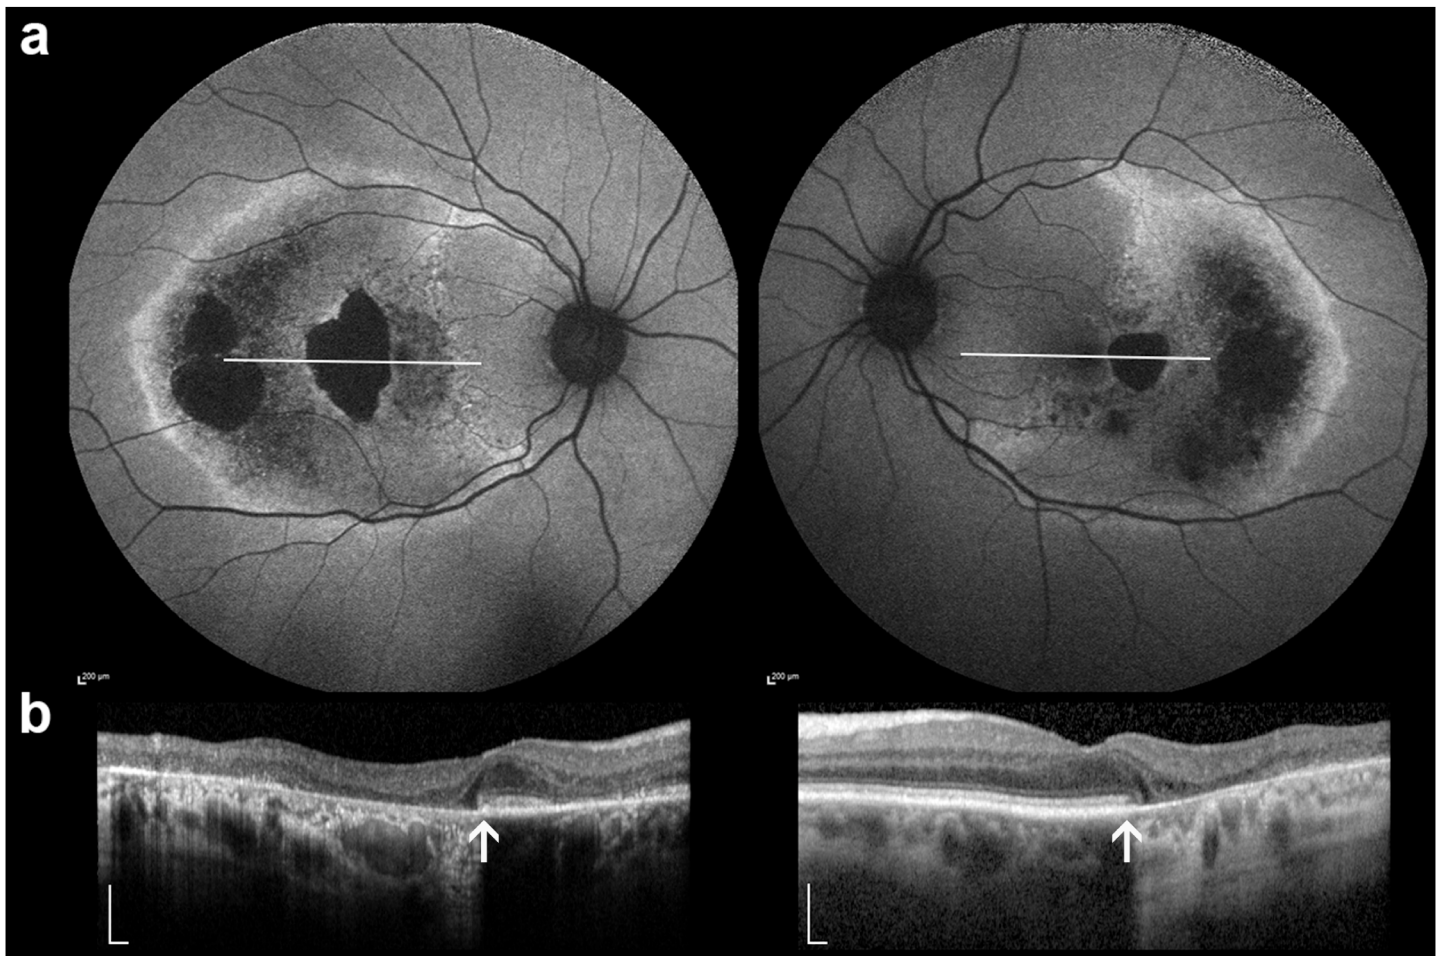

Supplemental File 4. Fundus autofluorescence of individual II-7 a) shows extensive parafoveal and temporal macula hypo-autofluorescence bilaterally b) The corresponding OCT scans taken at the white lines in 4a, show the point at which the outer retina has been lost temporal to the fovea (arrows).
