# Supplementary material
Source: HighWire-hosted journal article supplement (https://bjo.bmj.com/content/bjophthalmol-2020-318034)
Supplement: inline-supplementary-material-7 [file inline-supplementary-material-7.pdf]

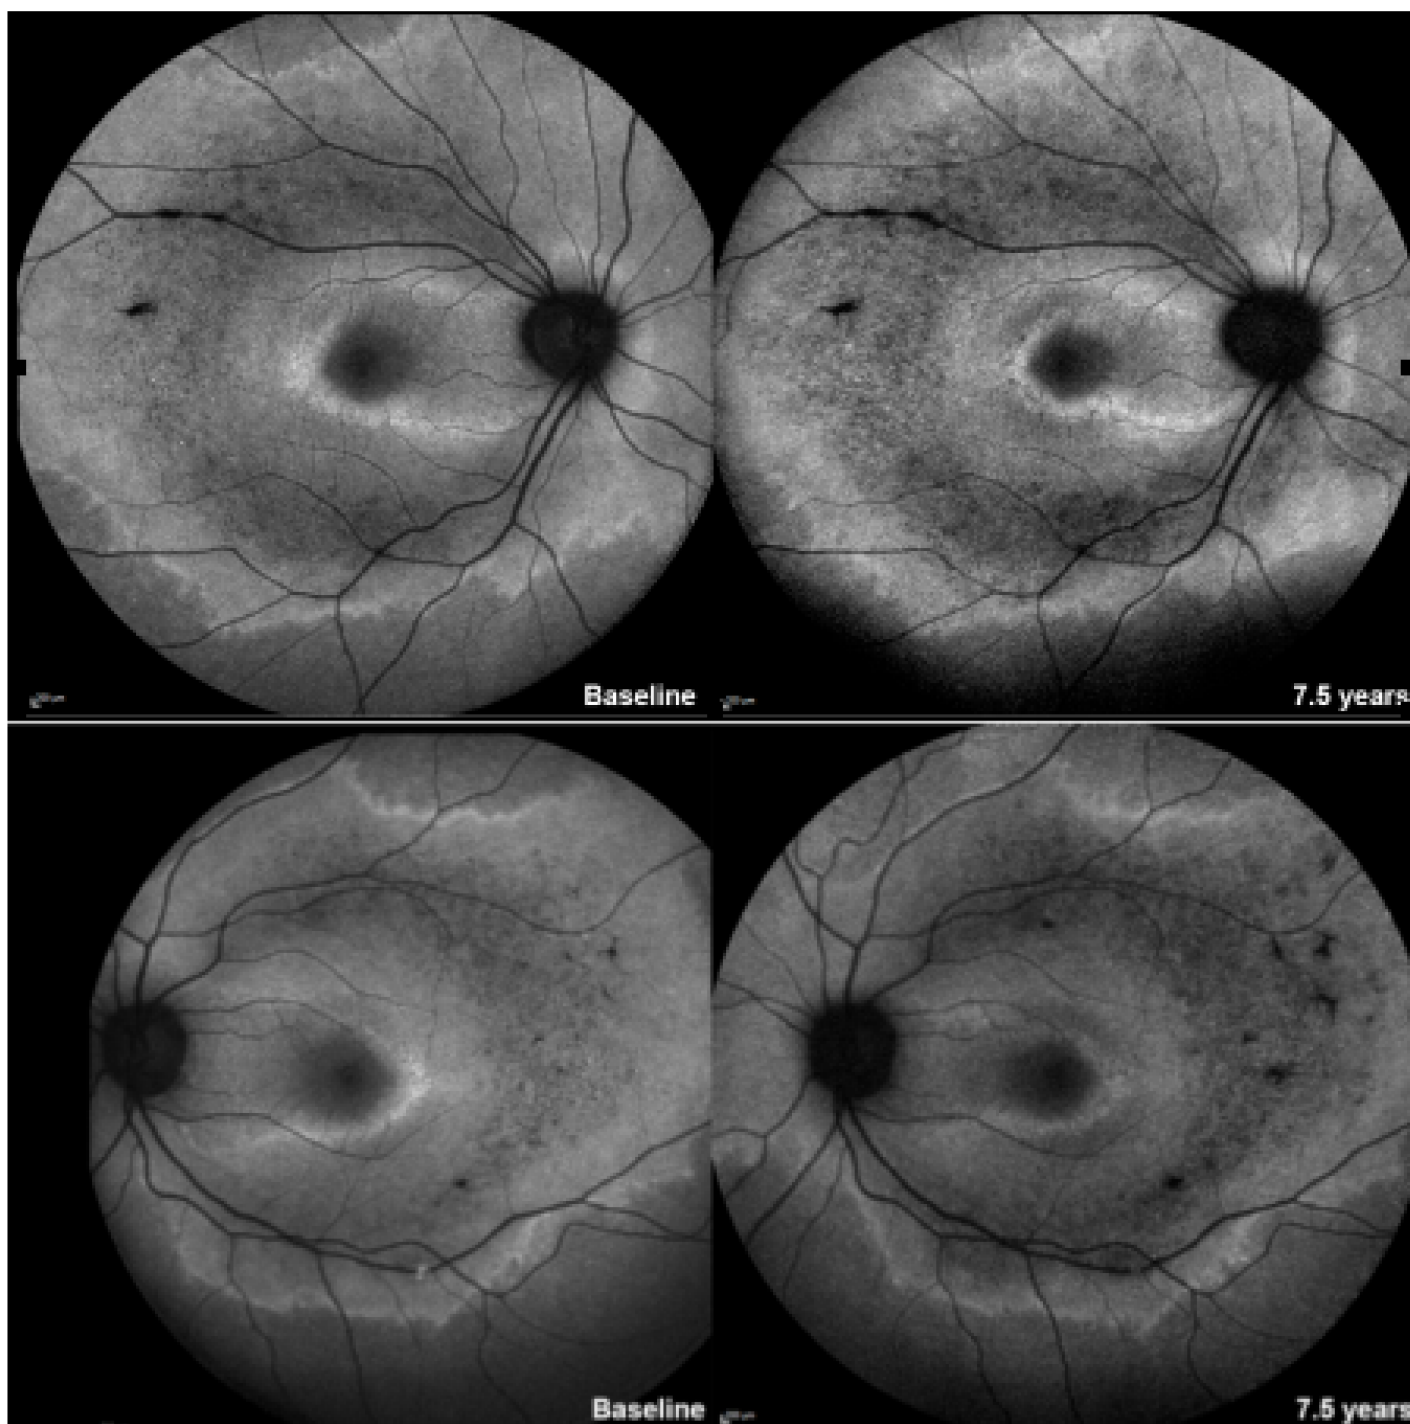

**Supplemental File 6. Fundus autofluorescence (FAF) of affected family member III-2 (36 years old at baseline). Longitudinal progression (7.5 years) of short-wavelength FAF, 55 degrees wide, for the right (top row) and left eye (bottom row). Baseline images have been spatially registered to the follow-up visit. Gradual constriction of the parafoveal hyper-autofluorescent rings and an increase in the area of perifoveal hypo-autofluorescence at the temporal macula in both eyes at 7.5 years compared to baseline.**
